# Supplementary material for: Small-Molecule Activators of Protein Phosphatase 2A for the Treatment of Castration-Resistant Prostate Cancer
Source: Oxford University Press journal article supplement (doi:10.1158/0008-5472.can-17-0123), 2018-01-22
Supplement: 00085472can170123-sup-177453_4_supp_4479322_p15xlj.docx [file 00085472can170123-sup-177453_4_supp_4479322_p15xlj.docx]

**Antibodies**

For immunoblotting, cleaved caspase-3 (no. 9664), β-Actin (no. 13E5), and PP2A C (no. 2038S) antibodies were obtained from Cell Signaling Technology. GAPDH (no. sc-32233), AR (C-terminus) (no. sc-815) were purchased from Santa Cruz Biotechnology, Inc. (Dallas, TX). AR (N-terminus) antibody (no. ab74272) was purchased from Abcam (Cambridge, MA). Cleaved PARP (p85) antibody (no. G7341) was obtained from Promega. p-AR ser81 (no. 04-078) and SV40 Small T antigen antibodies (no. pab280) were purchased from EMD Millipore (Billerica, MA). PSA antibody was purchased from Dako Agilent Technologies (no. A056201-2, Santa Clara, CA). Goat anti-mouse IgG-HRP conjugate (no. PI31430, ThermoFisher Scientific, Waltham, MA) or Goat anti-rabbit IgG-HRP conjugate (no. 31460, ThermoFisher Scientific, Waltham, MA) were used as secondary antibodies.

# Quantitative Real-Time PCR Qligonucleotide Sequences

Expression levels of *AR* and *AR* target genes mRNA were determined with validated sequence specific primer sequences. For each PCR reaction, 1μg RNA was reverse transcribed and each sample was run in triplicate. Each reaction contained 5μL of cDNA in a total volume of 20μL. Each cDNA sample was subjected to sequence-specific partial amplification with specific primers. The following primer pairs for qRT-PCR were used at 500nM final concentration.

| **Gene** | **Forward Primer Sequence** | **Reverse Primer Sequence** |
| --- | --- | --- |
| ***AR*** | GGTGAGCAGAGTGCCCTATC | GAAGACCTTGCAGCTTCCAC |
| ***PSA*** | CCTCCTGAAGAATCGATTCC | GAGGTCCACACACTGAAGTT |
| ***AMIGO2*** | AGAGACTCAGAGGCGACCAT | ATCAGCAAACACAGCAGCTC |
| ***BDNF*** | AGCCTCCTCTTCTCTTTC | AAATCCACTATCTTCCCC |
| ***CAMK2N1*** | GACCAAGCGGGTTGTTATTGA | TGCCTTGTCGGTCATATTTTTCA |
| ***FKBP5*** | CGGAGAACCAAACGGAAAGG | CTTCGCCCACAGTGAATGC |
| ***HPGD*** | ACAGCAGCCGGTTTATTGTGCTTC | TGGCATTCAGTCTCACACCACTGT |
| ***NCAPD3*** | ACCACTCACCATCATCTCAAGGCA | TGCTCTTCTTTGCCAGATCCTCGT |
| ***NOV*** | GCCTTACCCTTGCAGCTTAC | GAGCATGCTGTCCACTCTGT |
| ***ORM1*** | GCCTTTGACCTCAAGGATGA | CACGTGTGTGACAGCCTTCT |
| ***PLD1*** | GAGCCTGCTACAGATGGTCA | TGTCTACCAGCAGGACGAAG |
| ***SLUG*** | TTTCTGGGCTGGCCAAACATAAGC | ACACAAGGTAATGTGTGGGTCCGA |
| ***STEAP4*** | CGGCAGGTGTTTGTGTGTGGAAAT | AGAAGACACACAGCACAGCAGACA |
| ***TMPRSS2*** | TAGTGAAACCAGTGTGTCTGCCCA | AGCGTTCAGCACTTCTGAGGTCTT |
